# Supplementary material for: The discovery of a potent series of carboxamide TRPA1 antagonists
Source: Royal Society of Chemistry journal article supplement (doi:10.1039/c6md00387g), 2016-01-01

## Supplementary Figures

### 1. In vivo efficacy graphs and charts

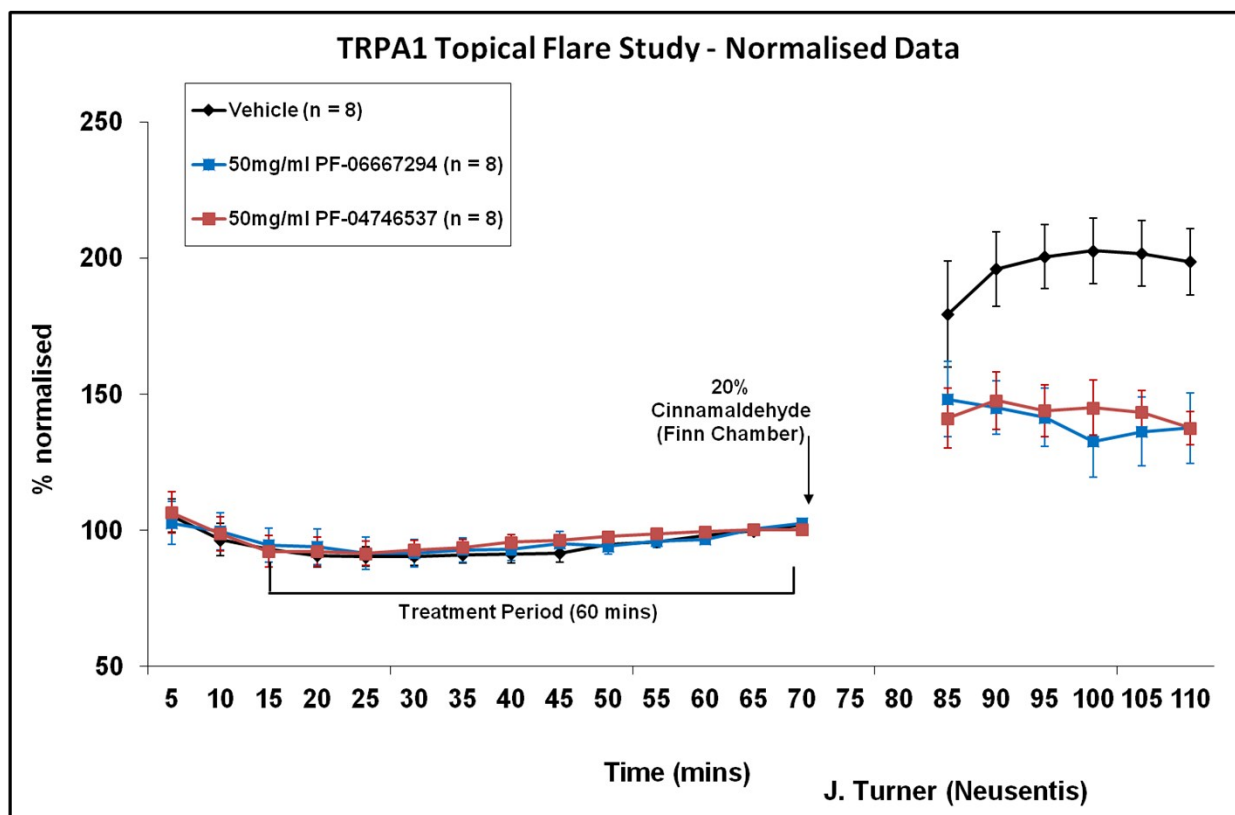

Normalised flare response after a topical cinnamaldehyde challenge with equivalent doses of compounds 4 and 8. Please note PF-6667294 is Compound 4 and PF-4746537 is Compound 8.

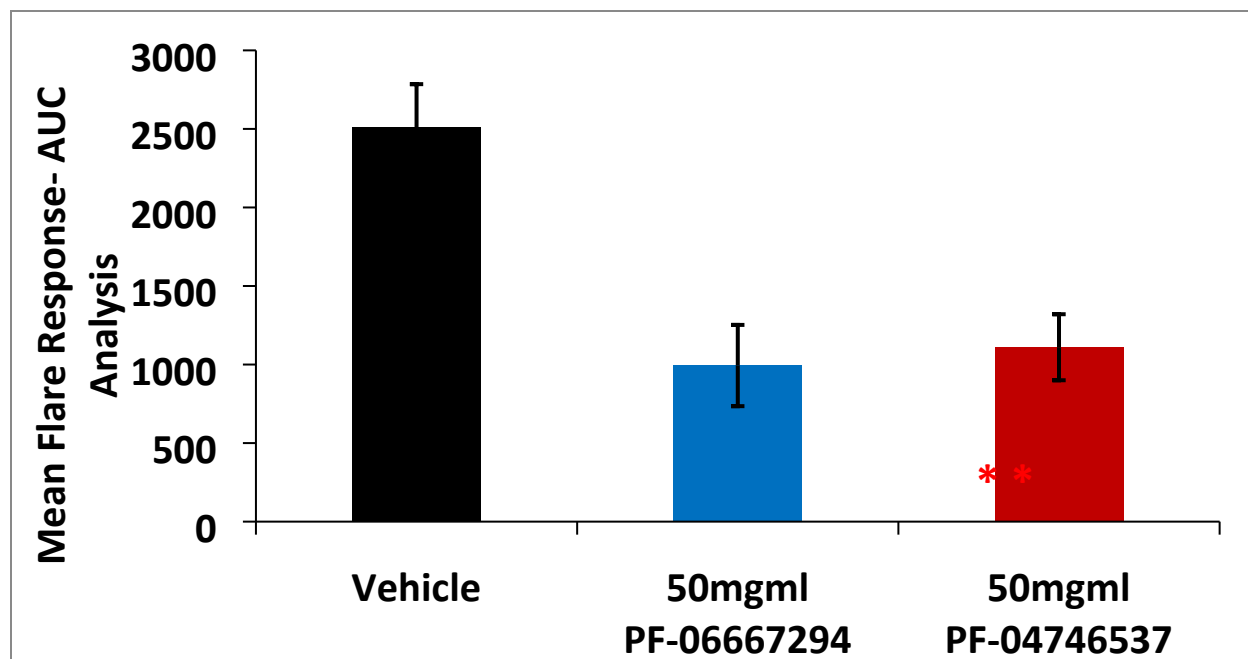

Mean flare response after a topical cinnamaldehyde challenge with equivalent doses of compounds 4 and 8. Please note PF-6667294 is Compound 4 and PF-4746537 is Compound 8.

## 2. In vitro pharmacology

Compound 39 broad TRP channel selectivity and Nav channel activity

|                    | % block $\pm$ SEM @ 1 microM | Selectivity vs. hTRPA1 |
|--------------------|------------------------------|------------------------|
| hTRPM8             | 6.44 $\pm$ 3.27              | > 1000                 |
| hTRPV1             | -17.44 $\pm$ 1.80            | > 1000                 |
| TRPV1 mouse DRG    | 35.07 $\pm$ 4.25             | > 1000                 |
| TTX-S Na mouse DRG | 22.40 $\pm$ 0.84             | > 1000                 |
| TTX-R Na mouse     | 62.03 $\pm$ 7.56             | > 500                  |

DRG

## TRPA1 Potency

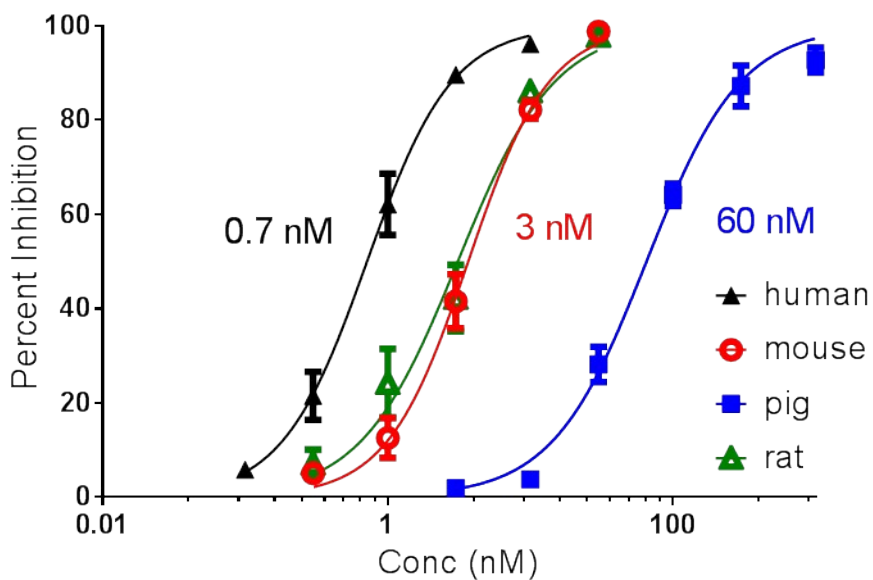

### Broad ion channel selectivity

| Compound 8             |                                  |
|------------------------|----------------------------------|
| Channel                | Activity (IC <sub>50</sub> , nM) |
| TRPA1 human            | 17                               |
| TRPV1 human            | >3000                            |
| TRPM8 human            | >3000                            |
| hERG                   | >20000                           |
| LQT1                   | 1830                             |
| SKCa channel           | >3000                            |
| L-type Ca              | >3000                            |
| Sodium channel site 2  | 660                              |
| GABAA chloride channel | 850                              |
| nAChR                  | >3000                            |
| AMPA                   | >3000                            |

Data were the mean of at least 2 experiments. Experiments were carried out either in-house or at CEREP. Assay formats were either patch clamp, radioligand binding displacement or ion flux.

| Compound 39            |                                     |
|------------------------|-------------------------------------|
| Channel                | Activity<br>(IC <sub>50</sub> , nM) |
| TRPA1 human            | 8                                   |
| TRPV1 human            | >3000                               |
| TRPM8 human            | >3000                               |
| TRPA1 rat              | 3                                   |
| TRPA1 mouse            | 4                                   |
| TRPA1 pig              | 65                                  |
| hERG                   | >20000                              |
| Kv1.5                  | >3000                               |
| Nav1.5                 | >3000                               |
| LQT1                   | >3000                               |
| SKCa channel           | >3000                               |
| L-type Ca              | >3000                               |
| Sodium channel site 2  | 730                                 |
| GABAA chloride channel | 2300                                |
| nAChR                  | >3000                               |
| AMPA                   | >3000                               |

Data were the mean of at least 2 experiments. Experiments were carried out either in-house or at CEREP. Assay formats were either patch clamp, radioligand binding displacement or ion flux.

### 3. Metabolite ID study on Compound 8

#### Compound 8 - Metabolism in Human Liver Microsomes

##### Summary:

PF-04746537 (*m/z* 509) was incubated with human liver microsomes (15min; 37°C; 10µM) and the resulting samples analysed by LC-MS/UV to enable detection of drug-related material. The positive control incubations (verapamil) formed the expected metabolites at appropriate levels.

In human liver microsomes unchanged PF-04746537 was the major drug-related component detected. The major metabolite observed resulted from dehydration and aromatisation at the 4-hydroxypiperidine moiety (**M9**; *m/z* 487; P-22); several mono-oxidised derivatives of **M9** were also observed (**M1**, **M2** (involving oxidation of the cyclopentyl ring) and **M11** (oxidation of the pyridinium group); *m/z* 503; P-6). Metabolite **M5** was identified as a product of N-dealkylation resulting in loss of the piperidine ring (*m/z* 357; P-152), whilst products of mono-oxidation in the cyclopentane (**M3** and **M6**; *m/z* 525; P+16) and phenylpropyl moieties (**M8** and **M10**; *m/z* 525; P+16) were also detected. Additional metabolites were postulated to arise from oxidation and dehydration in the piperidine ring (**M12** and **M13**; *m/z* 507; P-2), and mono-oxidation in the cyclopentane ring with oxidation and dehydration in the piperidine ring (**M4** and **M7**; *m/z* 523; P+14). There was also evidence of further minor products involving di-oxidation and dehydration (not shown).

### Metabolite Scheme:

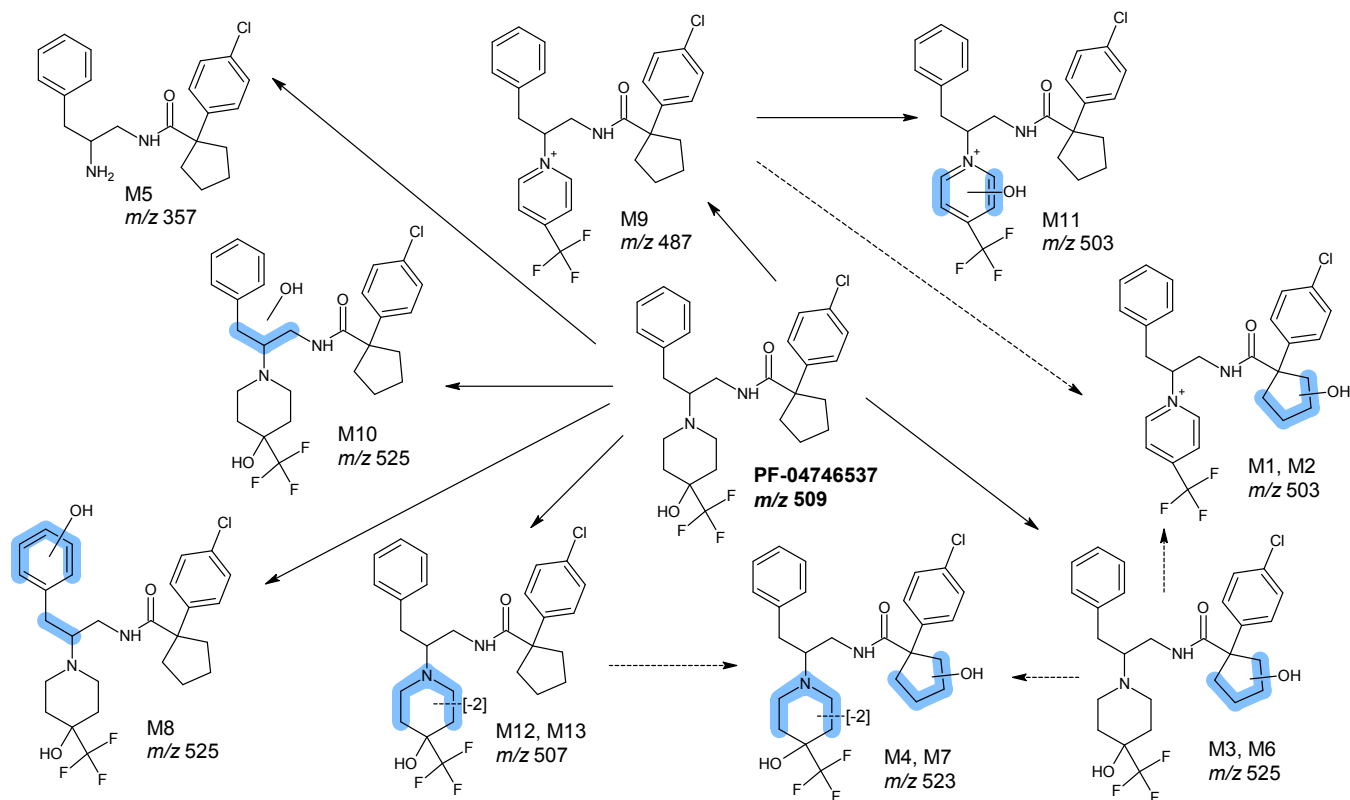

### UV and MS Chromatograms Following Incubation of Compound 8 in HLM:

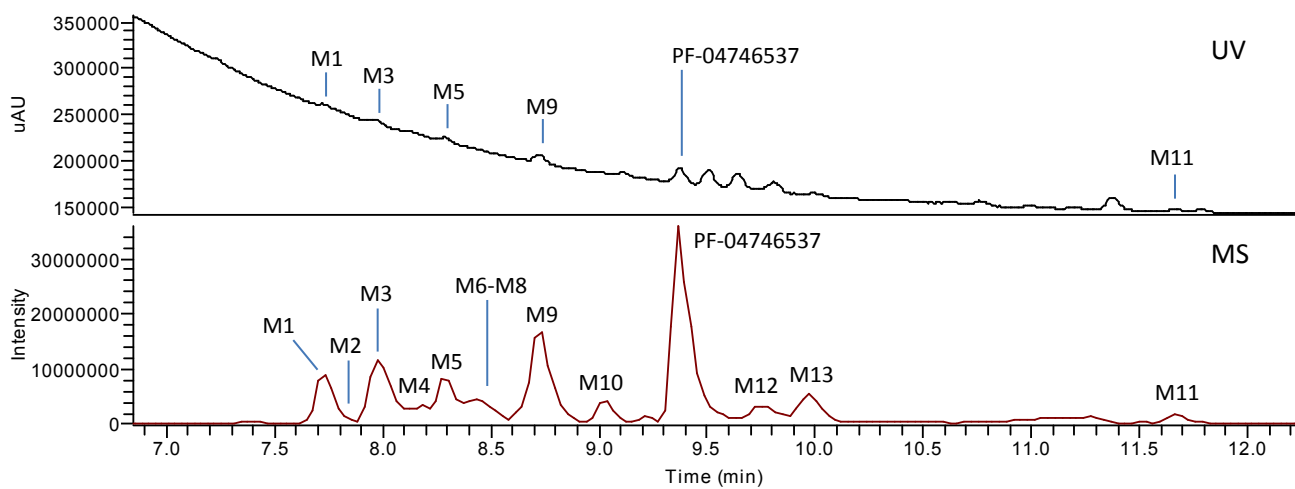

Supplement: c6md00387g1.pdf [file c6md00387g1.pdf]
